# Supplementary material for: Direct force measurement and loading on developing tissues in intact avian embryos
Source: Oxford University Press journal article supplement (doi:10.1242/dev.201054), 2023-04-18
Supplement: dev201054supp.pdf [file dev201054supp.pdf]

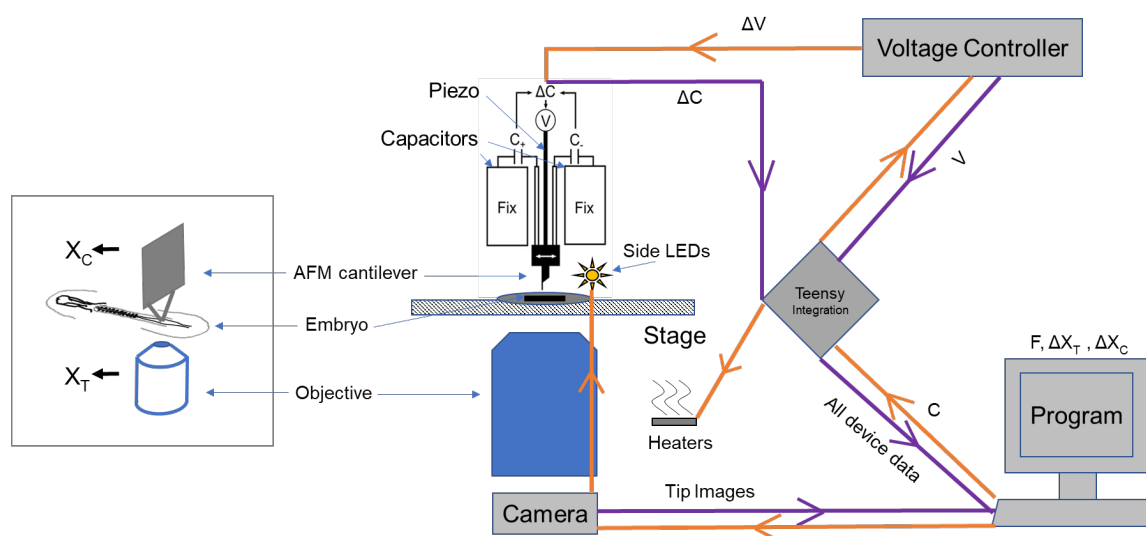

**Fig. S1. Diagram of the TiFM system**

The left image is the conceptual design related to the actual system on the right. Purple arrows indicate data flow and orange arrows indicate command signals.

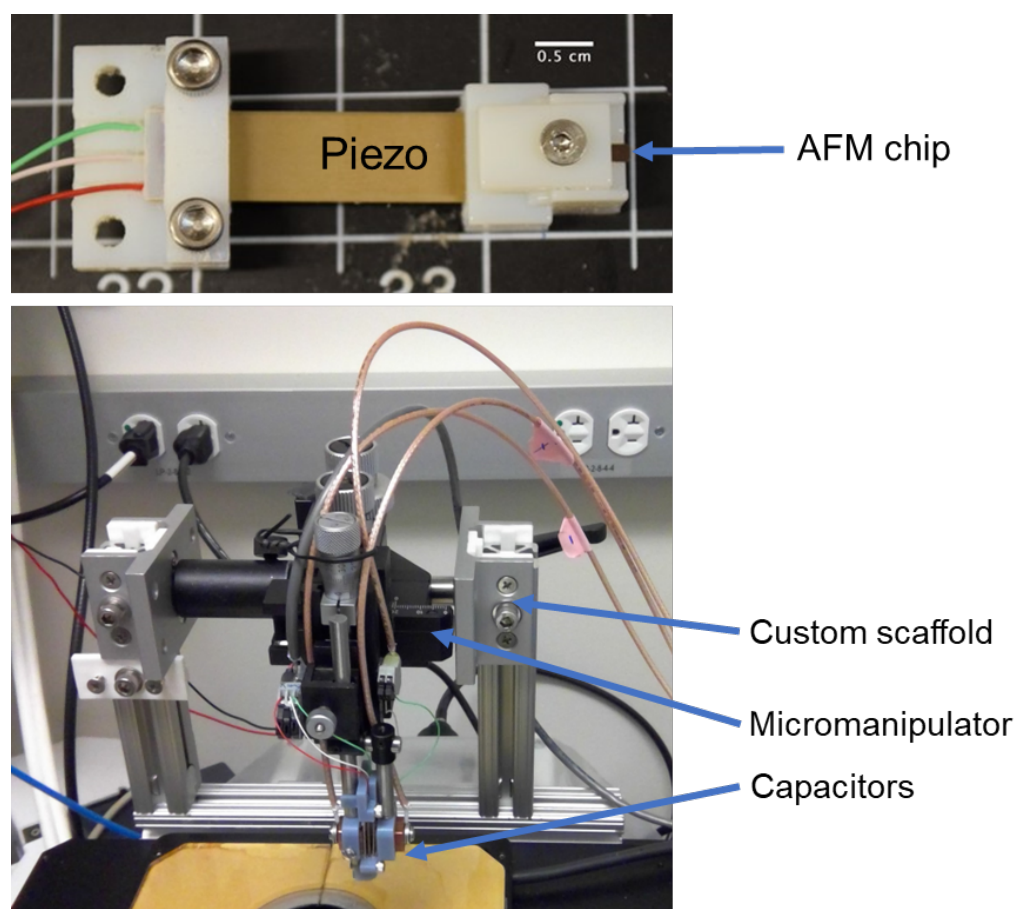

**Fig. S2. Custom printed/built parts of the TiFM system**

Top image shows the 3D-printed plastic piezo holders. Bottom image shows the overhang scaffold. These designs are flexible with the actual scope and piezo used.

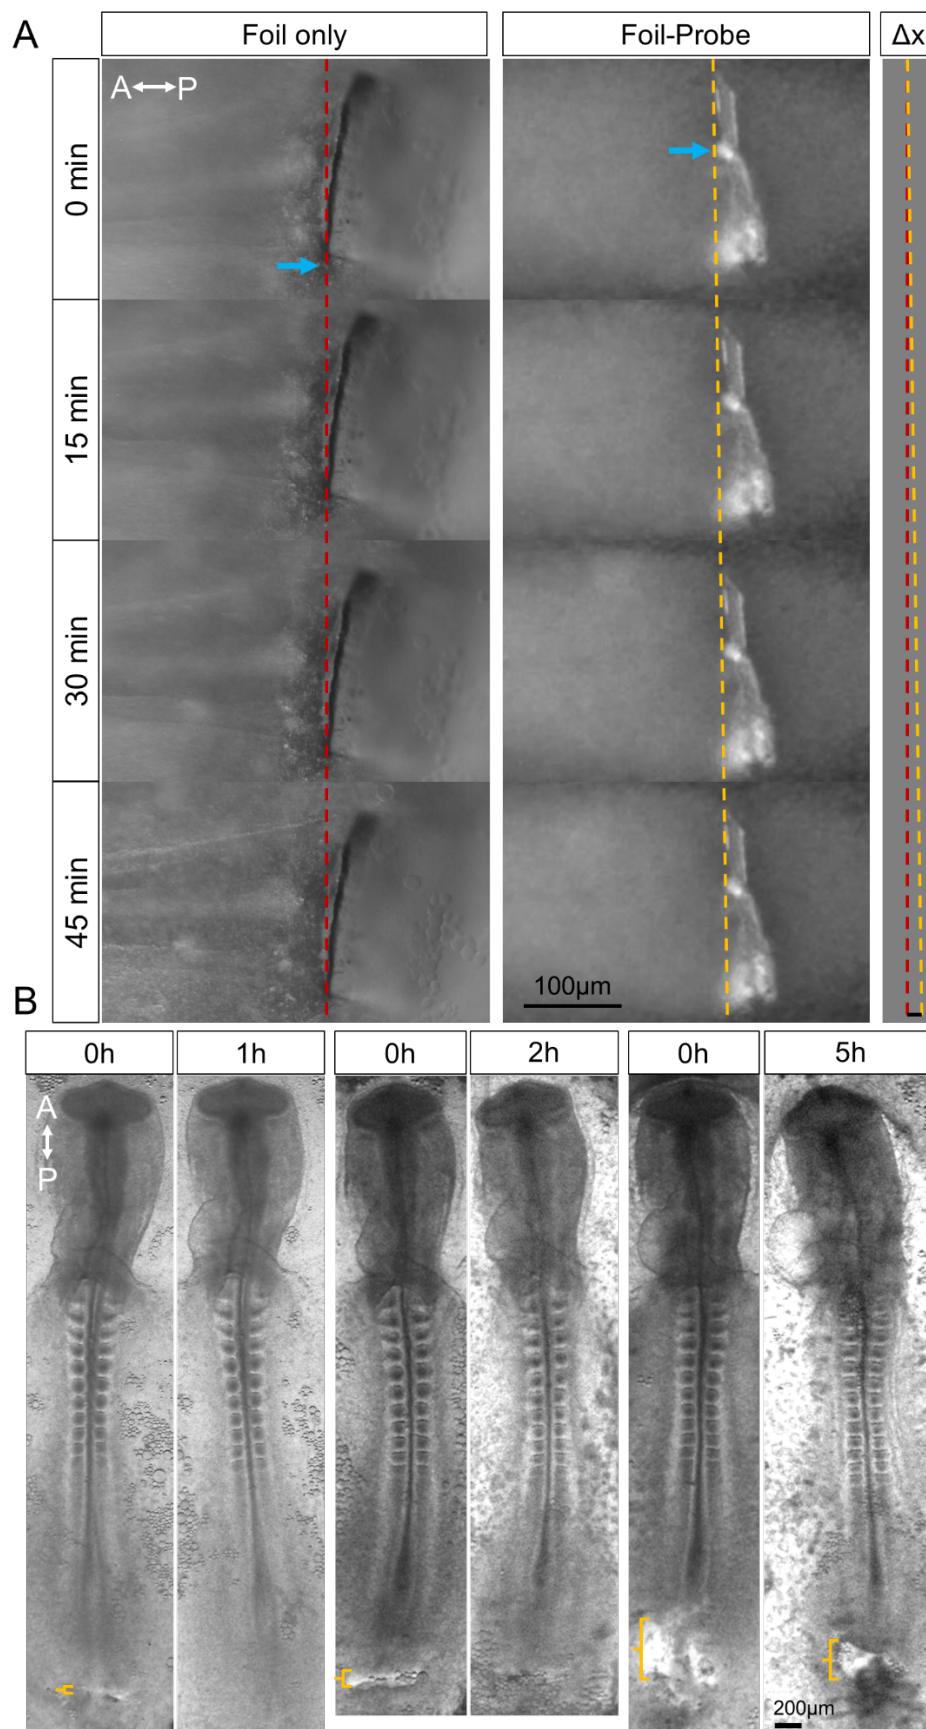

**Fig. S3. Controls for foil insertion experiments**

(A) Tissue forces are insufficient to bend aluminium foils. A stripe of aluminium foil tailored to a  $\sim 400\mu\text{m}$  (L)  $\times$   $\sim 200\mu\text{m}$  (W) stripe was glued directly to the holder chip

rather than the cantilever probe. Tracking of this foil (blue arrows indicate a high-contrast point of the foil that was tracked) shows that it remains static, while the foil attached to the probe (from Fig. 1E) shows a displacement ( $\Delta x$ ) of  $\sim 17\mu\text{m}$ . The force constant of the foils ( $k$ ) can be estimated using the following information: the thickness  $\sim 20\mu\text{m}$  ( $t$ ), Young's modulus of aluminium  $\sim 70\text{GPa}$  ( $E$ ), and the second moment of area of rectangular beams  $I = Wt^3/12$ . Here  $k = 3EI/L^3 \approx 500\text{ N/m}$  in the direction of the force under a free-end load condition (the value would be higher for the actual condition). This is significantly higher than the cantilever probes used ( $<1\text{ N/m}$ ) in the experiments.

(B) Tissue invasiveness of the foil experiments as evaluated by wound healing. The end of the body axis was actuated with a foil to create different sized wounds. For a slit-like wound the tissue heals under 1hr, as the wound widens, healing becomes slower and/or incomplete over a longer duration when the wounds are too large. For stress measurements, the wounds are slit-like and heal quickly. Yellow brackets mark the width of the wound after foil extraction along the AP axis.

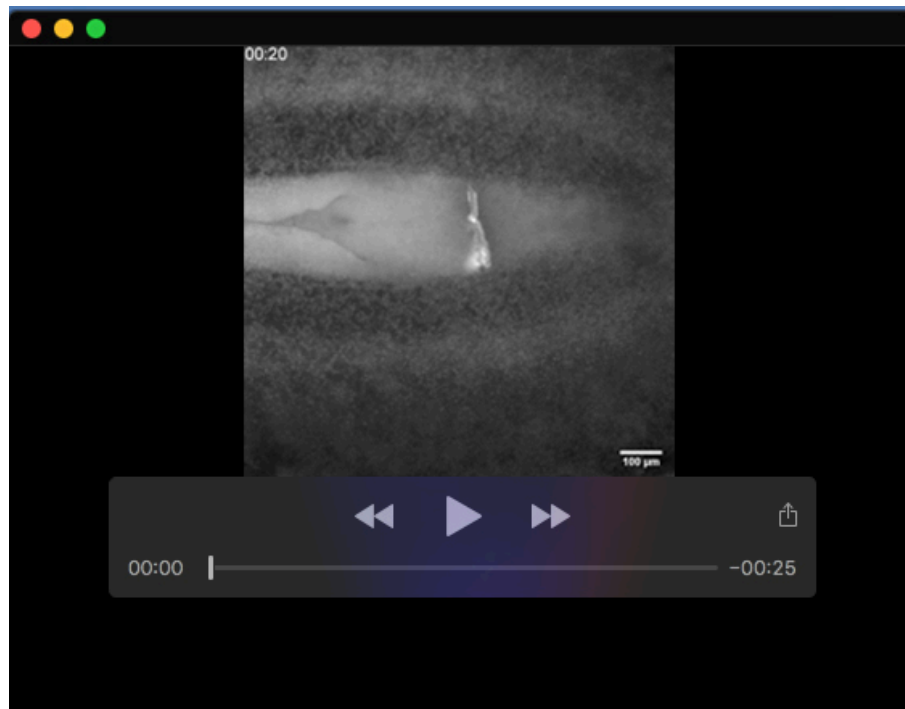

### Movie 1. Measuring axis elongation stress with TiFM

Time stamps are hh:mm. This is a dorsal view of the tail end of a GFP embryo, anterior to the left. A small displacement of the foil is visible, providing information for inferring the stress. Refer to text and Fig. S3 for further details.

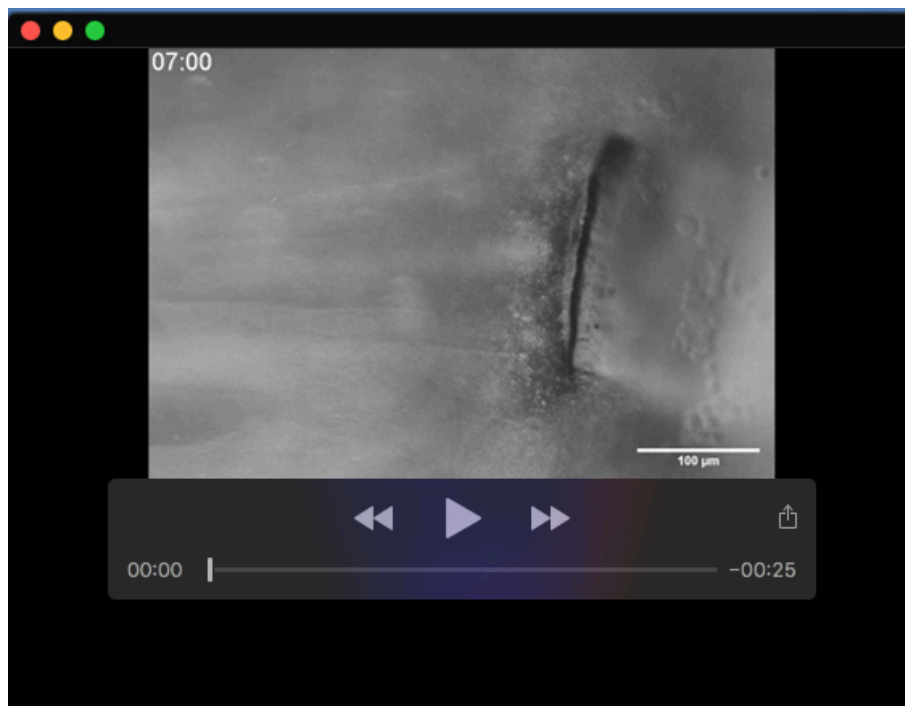

### Movie 2. Foil-only control for axis elongation stress with TiFM

Time stamps are mm:ss. This is a dorsal view of the tail end of a WT embryo, anterior to the left. No stable displacement of the foil is observed (small short-term vibrations may be observed due to environmental noise). Refer to text and Fig. S3 for further details.

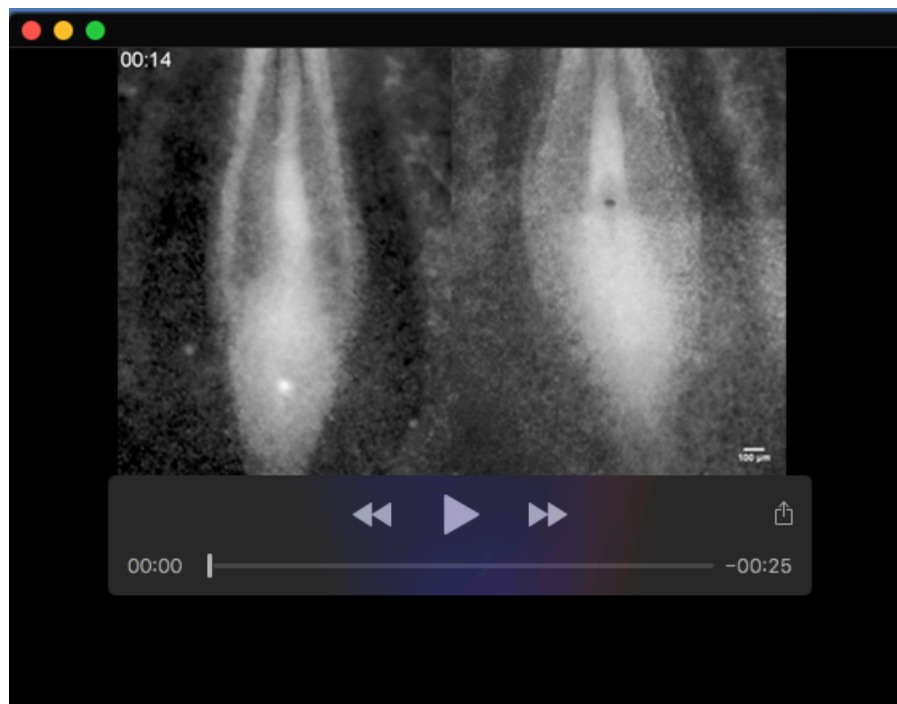

### Movie 3. Force loading on a live embryo

Time stamps are hh:mm. Two GFP embryos, a control (left) and a loaded one (right) are shown, anterior to the top. Probe tip (modified with epoxy) is visible as a bright sphere with a dark bar in the center in the loaded embryo. The loaded embryo elongates at a faster rate. Refer to text for further details.

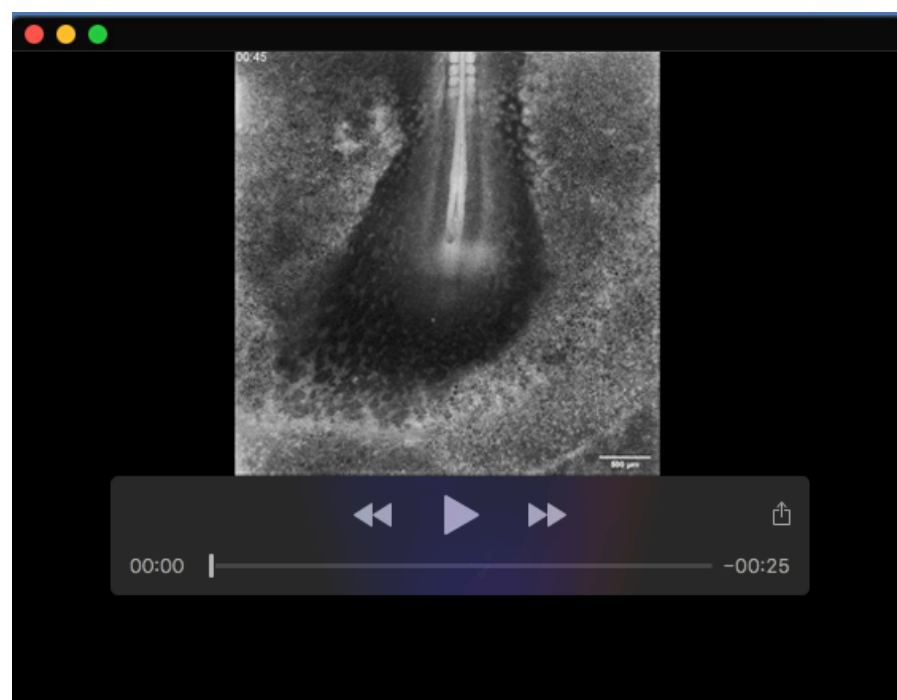

### Movie 4. Patterned tissue deformation on a loaded embryo

Time stamps are hh:mm. This GFP embryo was loaded at 200nN and then unloaded. Anterior to the top. Probe tip is visible at the tail-end midline as a dark dot. Refer to text and Fig. 3A for further details.
